# Supplementary material
Source: PubMed Central journal article supplement (PMC3340421)
Supplement: NIHMS122095-supplement-1_si_001.pdf [file NIHMS122095-supplement-1_si_001.pdf]

Supporting Information for

**Re(bpy)(CO)<sub>3</sub>CN as a Probe of Conformational Flexibility in a  
Photochemical Ribonucleotide Reductase**

Steven Y. Reece,<sup>‡</sup> Daniel A. Lutterman,<sup>‡</sup> Mohammad R. Seyedsayamdost,<sup>‡</sup> JoAnne Stubbe,<sup>§,‡,\*</sup>  
and Daniel G. Nocera<sup>‡,\*</sup>

*Departments of Chemistry<sup>‡</sup> and Biology<sup>§</sup>, Massachusetts Institute of Technology, 77  
Massachusetts Avenue, Cambridge, MA 02139-4307*

*stubbe@mit.edu; nocera@mit.edu*

| <i>Index</i>                                                                                                                                                   | <i>Page</i> |
|----------------------------------------------------------------------------------------------------------------------------------------------------------------|-------------|
| <b>Figure S1.</b> TA spectra of solutions of [Re]-F-R2C19 and [Re]-Y-R2C19.                                                                                    | S2          |
| <b>Figure S2.</b> Stopped-flow traces of [Re]-F-βC19 mixed with assay buffer, α2:[Re]-F-βC19 mixed with assay buffer, and α2:[Re]-F-βC19 mixed with Ac-Y-βC19. | S3          |
| <b>Figure S3.</b> MP-FRaP trace of [Re]-Y-βC19.                                                                                                                | S4          |

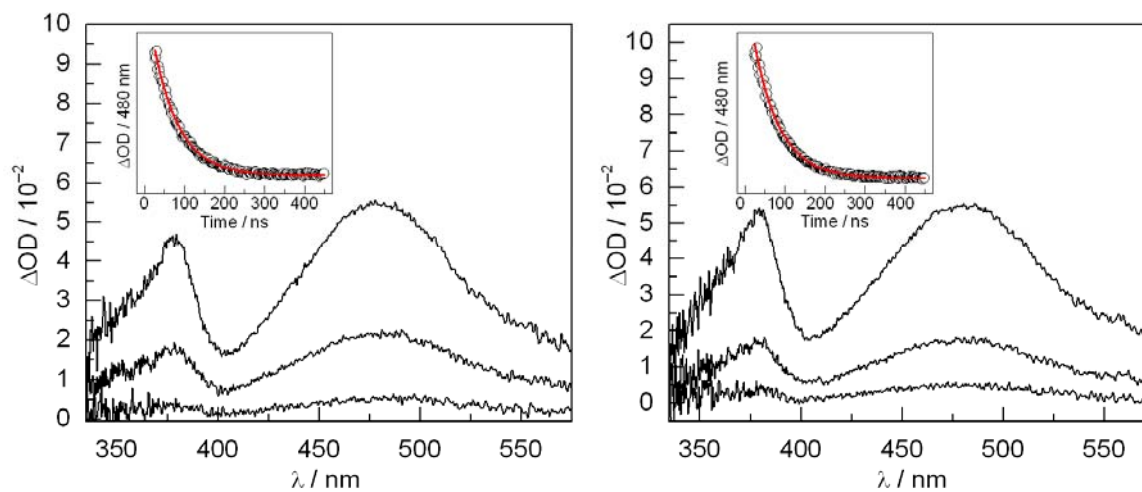

**Figure S1.** TA spectra of 100  $\mu\text{M}$  solutions of [Re]-F-R2C19 (left) and [Re]-Y-R2C19 (right) in 50 mM Tris buffer (pH 7.6), 20% glycerol, 1 mM CDP, 3 mM ATP, and 15 mM  $\text{MgSO}_4$  recorded at 65, 115, and 215 ns following a 355 nm laser pulse. Insets: Single wavelength kinetics traces ( $\circ$ ) with single exponential fit ( $\text{—}$ ) recorded at 480 nm ( $\tau = 64 \pm 1$  ns for both samples).

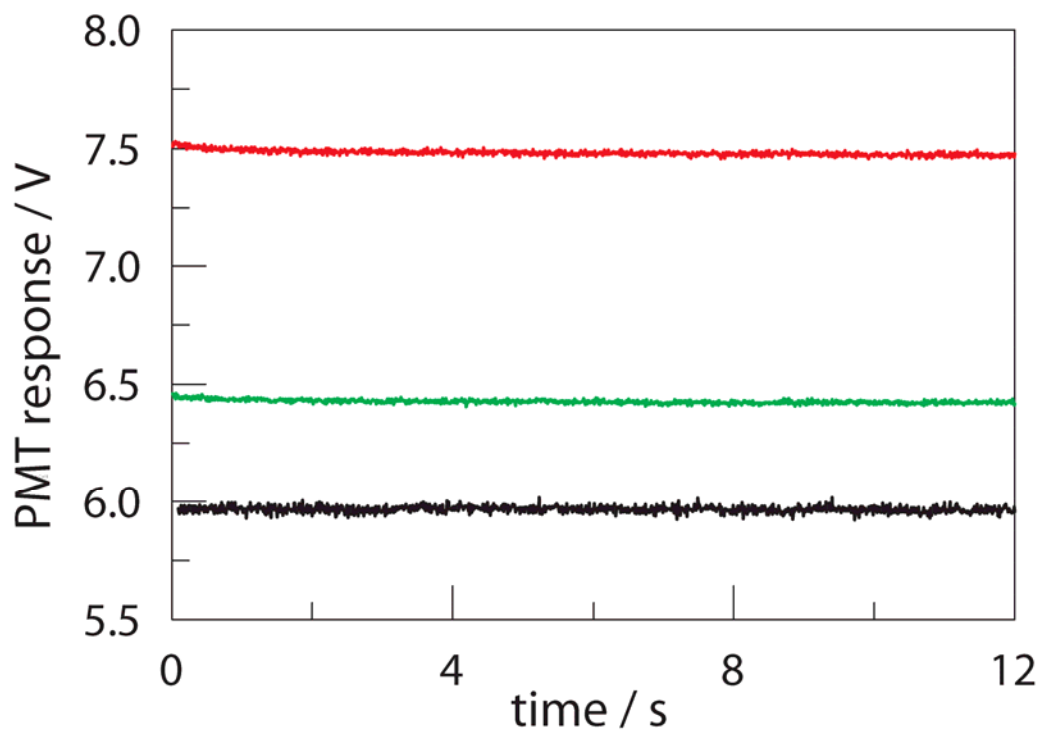

**Figure S2.** Stopped-flow phosphorescence when (a) [Re]-F- $\beta$ C19 is mixed in equal volumes with assay buffer (—) (b)  $\alpha$ 2:[Re]-F- $\beta$ C19 is mixed in equal volumes with assay buffer (—) and (c)  $\alpha$ 2:[Re]-F- $\beta$ C19 is mixed in equal volumes with Ac-Y- $\beta$ C19 (—).

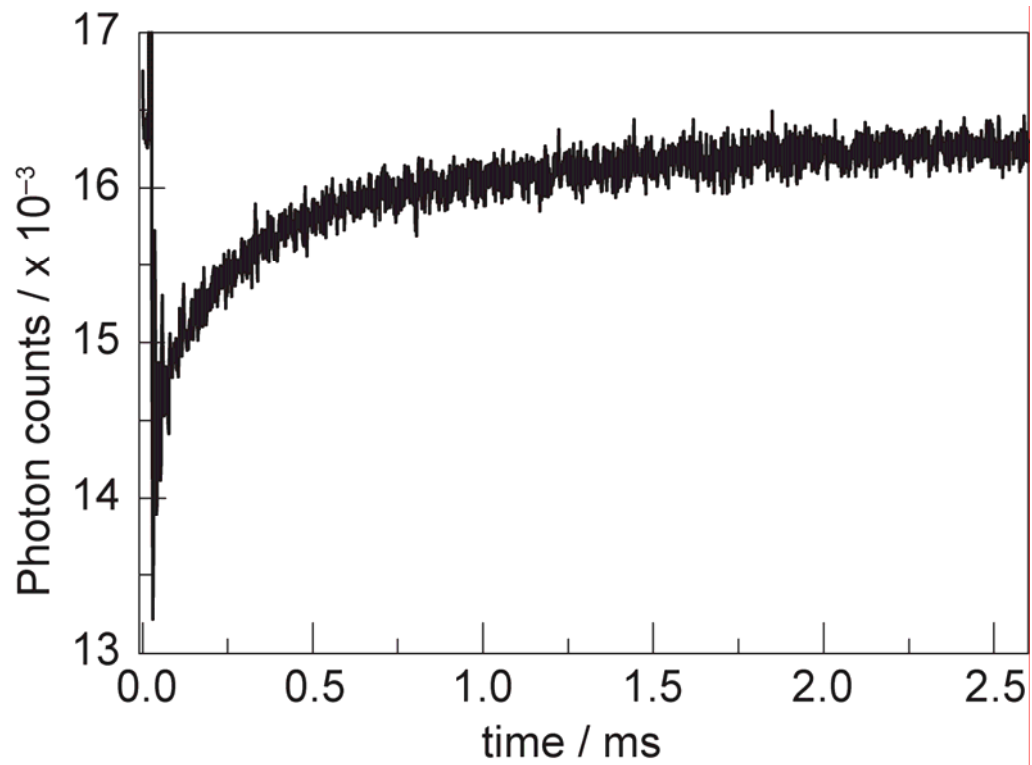

**Figure S3.** MP-FRAP trace of 3.65 mM [Re]-Y- $\beta$ C19 in 50 mM Tris, pH = 7.6.
